# Supplementary material
Source: Royal Society of Chemistry journal article supplement (doi:10.1039/d5cy01583a)
Supplement: d5cy01583a1.pdf [file d5cy01583a1.pdf]

**Preparation of CuCo/NH<sub>2</sub>-MIL-101(Fe) nanocomposite for photocatalytic synthesis of 2,3-dihydroquinazolin-4(1H)-ones and 1-amidoalkyl-2-naphthols**

Neda Cheraghi, Mohammad Jafarzadeh\*

*Faculty of Chemistry, Razi University, Kermanshah 67149-67346, Iran*

*\*Correspondence: E-mail: mjafarzadeh5@gmail.com, m.jafar@razi.ac.ir; Tel.: +98-83-34279296*

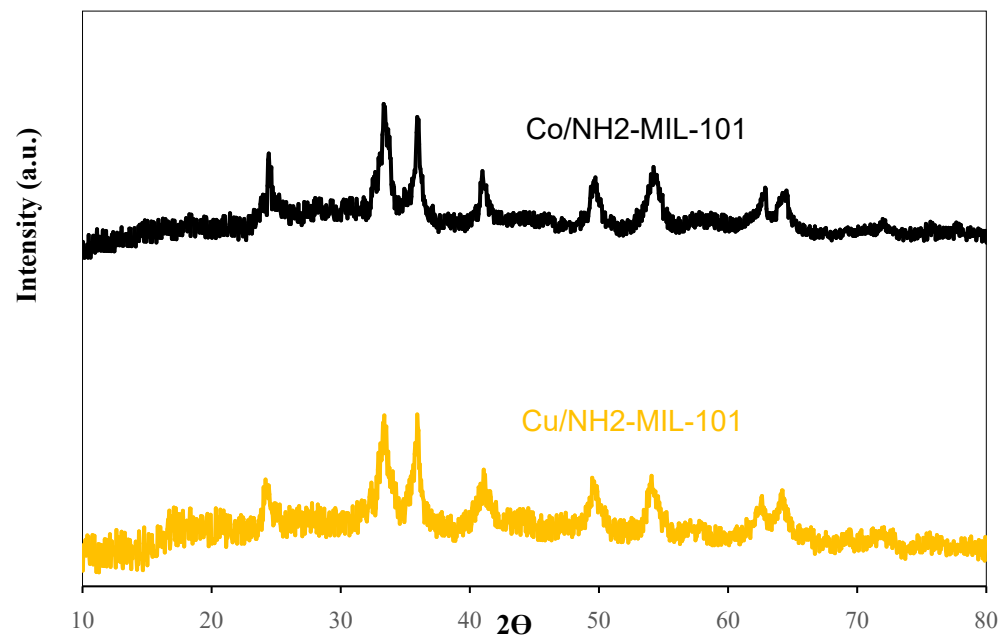

**Figure S1.** XRD patterns of Co/NH<sub>2</sub>-MIL-101 and Cu/NH<sub>2</sub>-MIL-101.

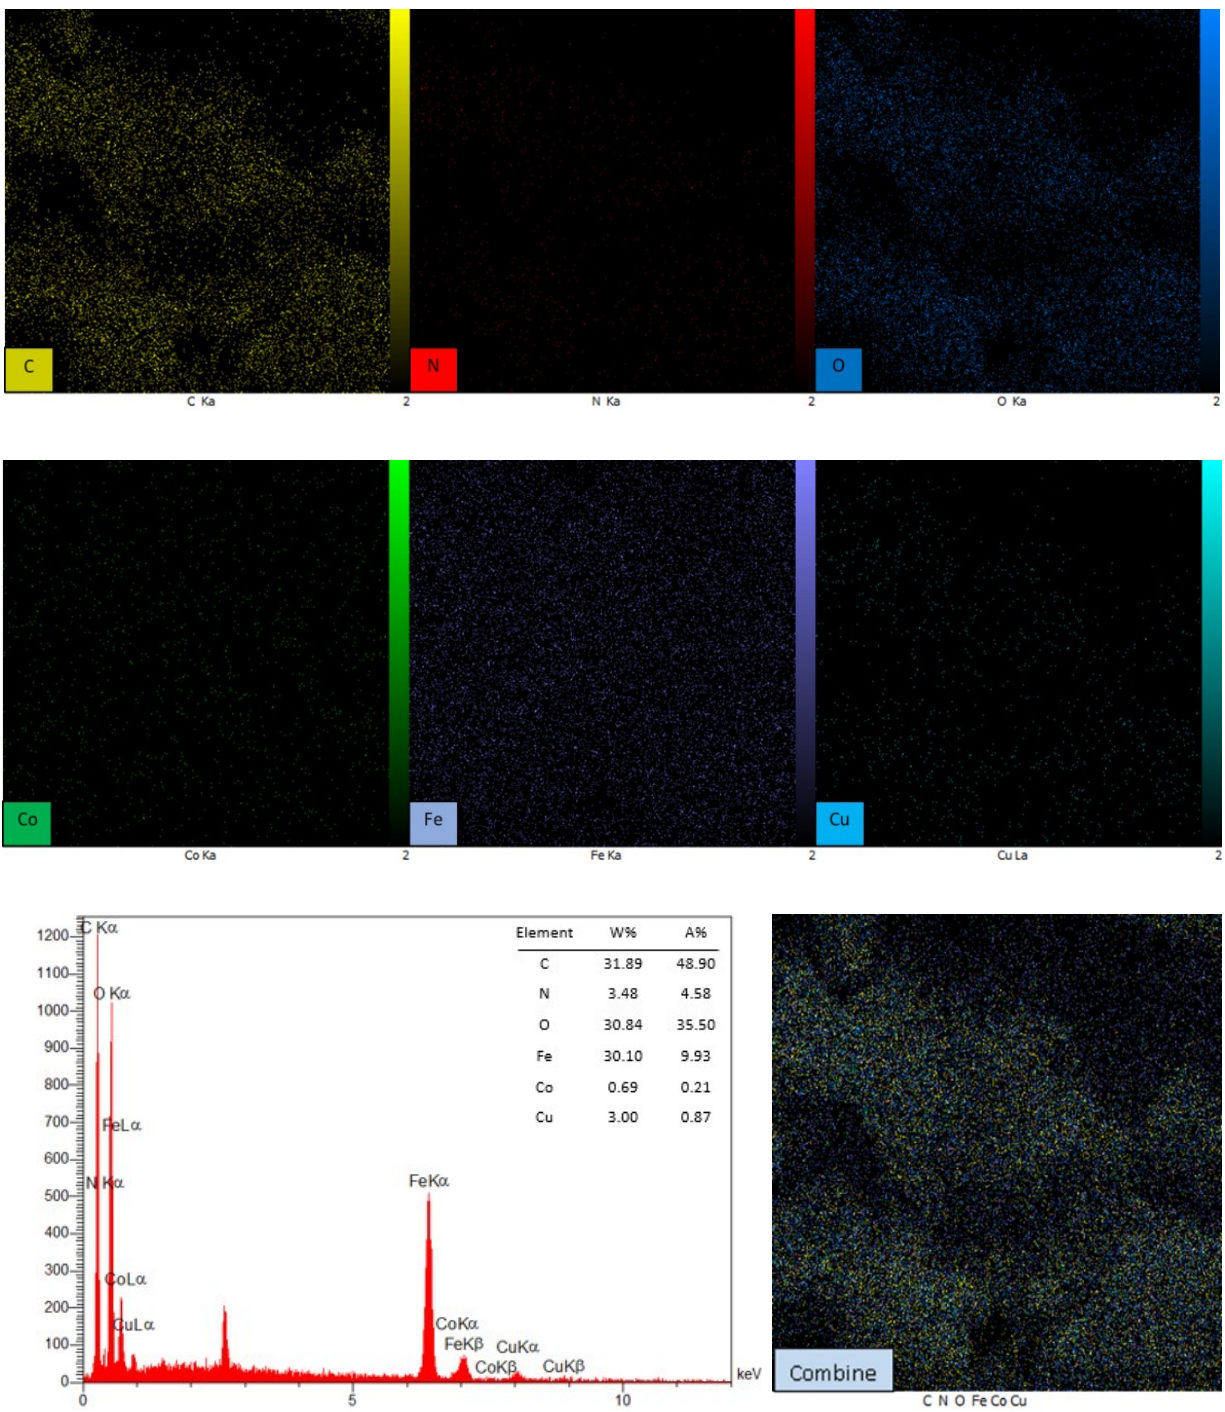

**Figure S2.** Elemental mapping and EDX spectrum for a specific region of CuCo/NH<sub>2</sub>-MIL-101.

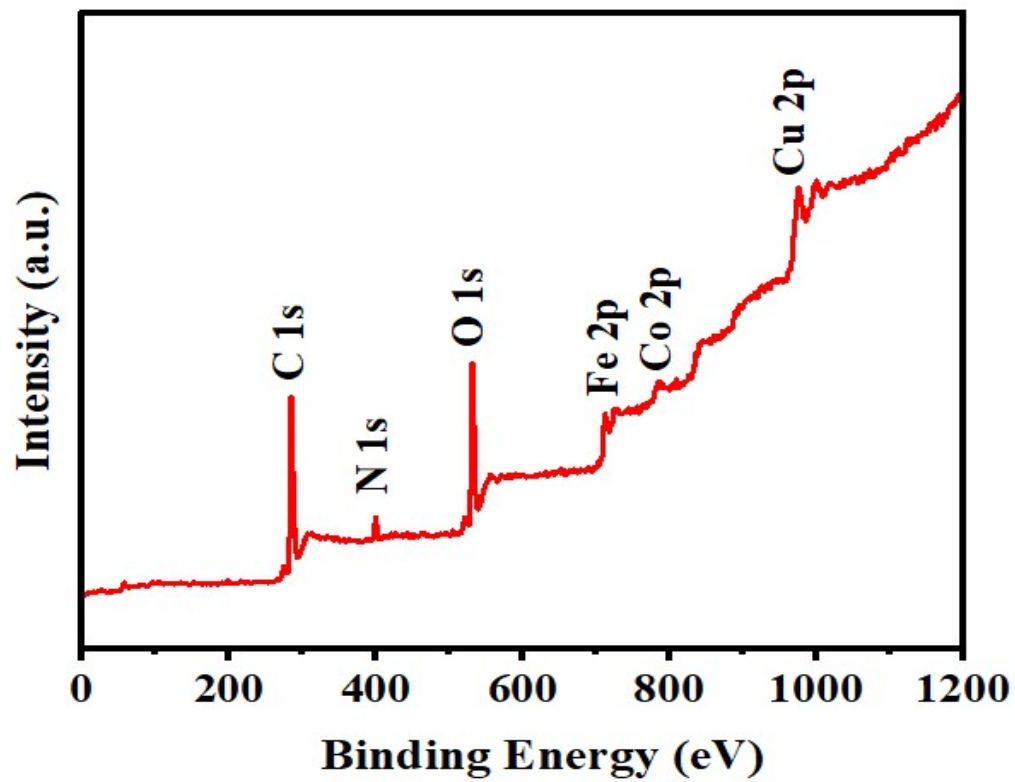

Figure S3. XPS survey of CuCo/NH<sub>2</sub>-MIL-101(Fe).

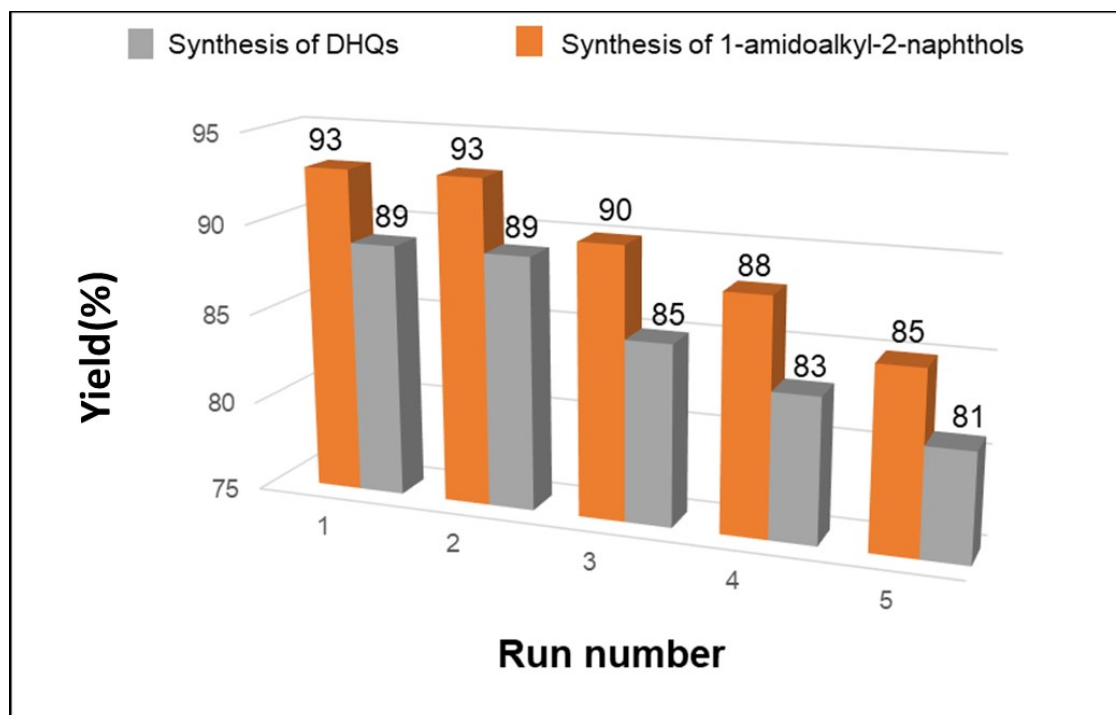

**Figure S4.** Reusability of the photocatalyst for the synthesis of 2-phenyl-2,3-dihydroquinazolin-4(1*H*)-ones (DHQs) and 1-amidoalkyl-2-naphthols.

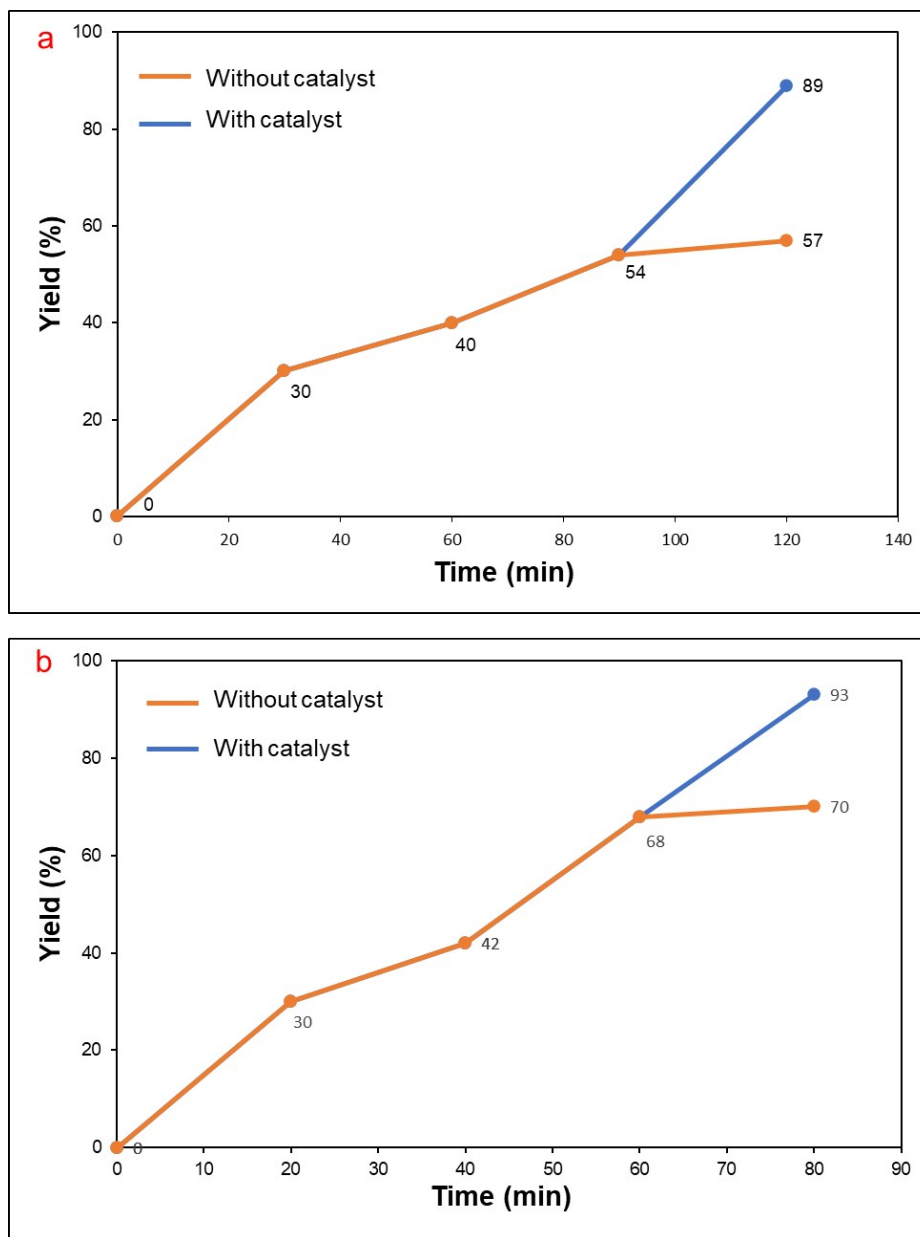

**Figure S5.** Hot filtration test of the photocatalyst for the synthesis of (a) 2-phenyl-2,3-dihydroquinazolin-4(1H)-one and (b) 1-amidoalkyl-2-naphthol.

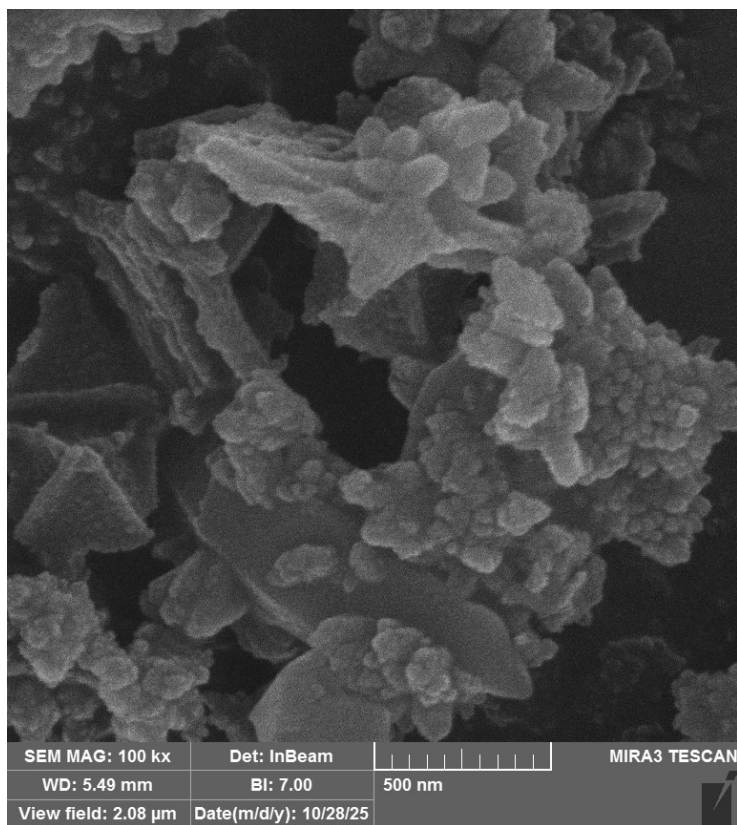

**Figure S6.** SEM image of the reused CuCo/NH<sub>2</sub>-MIL-101.

**Table S1.** Performance of CuCo/NH<sub>2</sub>-MIL-101 in the synthesis of 2-phenyl-2,3-dihydroquinazolin-4(1*H*)-one compared to the reported catalytic systems.

| Entry          | Catalyst (loading)                    | Conditions           | Solvent            | Time (h) | Yield (%) | Ref       |
|----------------|---------------------------------------|----------------------|--------------------|----------|-----------|-----------|
| 1              | Urea-rich POP (0.02 g)                | 100 °C               | -                  | 1        | 85        | 1         |
| 2              | Hydroxypatite NPs (0.05 g)            | 110 °C               | H <sub>2</sub> O   | 1        | 95        | 2         |
| 3              | β-Cyclodextrin (10 mol%)              | 90 °C                | -                  | 1        | 90        | 3         |
| 4 <sup>a</sup> | MOF(Zr)/rGO (0.02 g)                  | 55 °C                | EtOH               | 0.5      | 95        | 4         |
| 5 <sup>a</sup> | MOF(Nd) (10 mol%)                     | 25 °C                | CH <sub>3</sub> CN | 24       | 100       | 5         |
| 6 <sup>a</sup> | MOFCu) (5.0 mol %)                    | 70 °C/N <sub>2</sub> | MeOH               | 12       | 79        | 6         |
| 7 <sup>a</sup> | MOF(In) (0.004 g, 1 mol %)            | reflux/air           | EtOH               | 10       | 99        | 7         |
| 8 <sup>a</sup> | α-Chymotrypsin (0.36 mol%)            | LED (18 W)/37 °C     | MeOH               | 2        | 96        | 8         |
| 9              | CuCo/NH <sub>2</sub> -MIL101 (0.02 g) | LED (200 W)/35 °C    | EtOH               | 2        | 89        | This work |

<sup>a</sup> 2-Aminobenzamide.

**Table S2.** Performance of CuCo/MIL-101-NH<sub>2</sub> in the synthesis of *N*-((2-hydroxynaphthalen-1-yl)(phenyl)methyl)benzamide compared to the reported catalytic systems.

| Entry | Catalyst (loading)                                                  | Conditions            | Solvent            | Time (min) | Yield (%) | Ref       |
|-------|---------------------------------------------------------------------|-----------------------|--------------------|------------|-----------|-----------|
| 1     | Fe <sub>3</sub> O <sub>4</sub> @SiO <sub>2</sub> @K10 NPs (0.08 mg) | 70 °C                 | -                  | 25         | 96        | 9         |
| 2     | ZS-1 Zeolite (0.05 mg)                                              | 110 °C                | -                  | 30         | 95        | 10        |
| 3     | MSNs-HPZ-SO <sub>3</sub> H (0.01 g)                                 | 120 °C                | -                  | 95         | 84        | 11        |
| 4     | Nano-BF <sub>3</sub> ·SiO <sub>2</sub> (0.02 g)                     | 80 °C                 | EtOAc              | 50         | 95        | 12        |
| 5     | Cu@Ag-CeO <sub>2</sub> /chitosan (0.01 g)                           | 100 °C                | -                  | 15         | 98        | 13        |
| 6     | MIL101(Cr)/phosphotungstic acid (5.1 mol%)                          | 130 °C                | -                  | 5          | 92        | 14        |
| 7     | MOF(Cu/Ag)/MCM-41 (0.1 g)                                           | 130 °C                | -                  | 10         | 93        | 15        |
| 8     | CdS-Fe <sub>3</sub> O <sub>4</sub> (0.03 g)                         | Hg lamp (400 W)/82 °C | CH <sub>3</sub> CN | 90         | 93        | 16        |
| 9     | CuCo/NH <sub>2</sub> -MIL-101 (0.02 g)                              | LED (200 W)/35 °C     | EtOH               | 80         | 93        | This work |

## Spectral Data

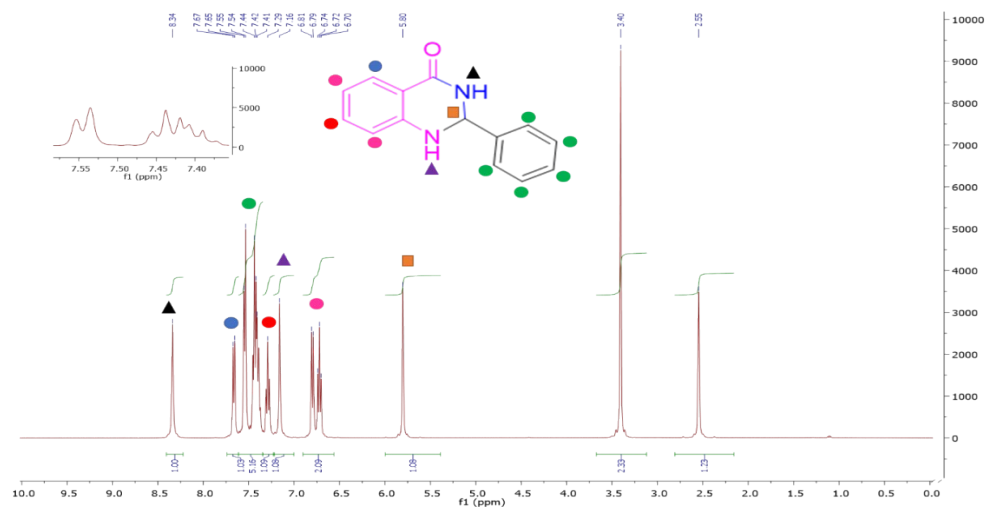

$^1\text{H}$  NMR (400 MHz,  $\text{DMSO-}d_6$ )  $\delta$  8.34 (s, 1H), 7.67–7.65 (d,  $J = 7.7$  Hz, 1H), 7.55–7.54 (m, 5H), 7.44–7.41 (s, 1H), 7.16 (s, 1H), 6.81–6.70 (m, 2H), 5.80 (s, 1H).

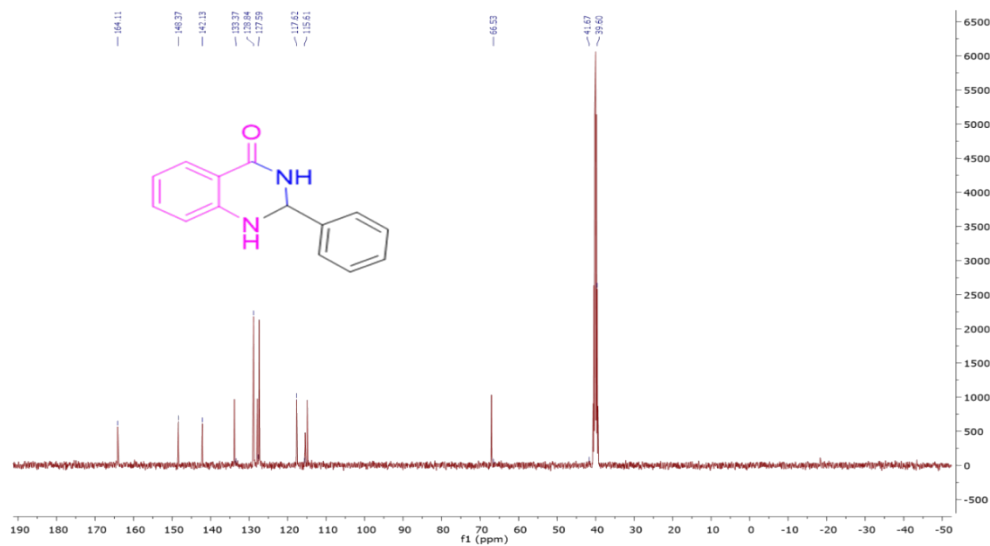

$^{13}\text{C}$  NMR (100 MHz,  $\text{DMSO-}d_6$ )  $\delta$  164.1, 148.3, 142.1, 133.3, 128.8, 127.5, 117.6, 115.6, 66.5.

**Figure A1.**  $^1\text{H}$  and  $^{13}\text{C}$  NMR of 2-phenyl-2,3-dihydroquinazolin-4(1H)-one.

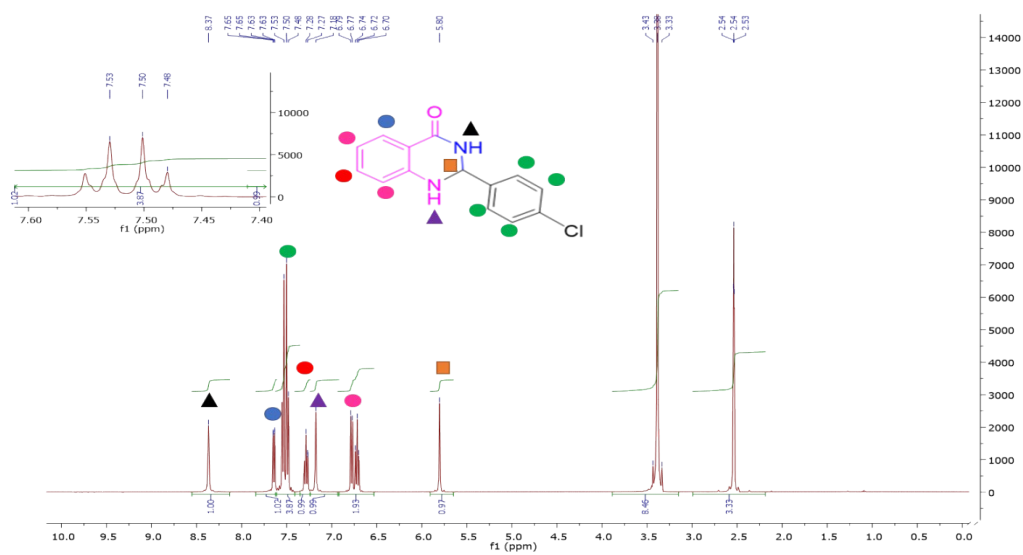

<sup>1</sup>H NMR (400 MHz, DMSO-*d*<sub>6</sub>) δ 8.37 (s, 1H), 7.65–7.63 (dd, *J* = 7.7, 1.1 Hz, 1H), 7.53–7.48 (q, 4H), 7.28–7.27 (m, 1H), 7.18 (s, 1H), 6.79–6.70 (m, 2H), 5.80 (s, 1H).

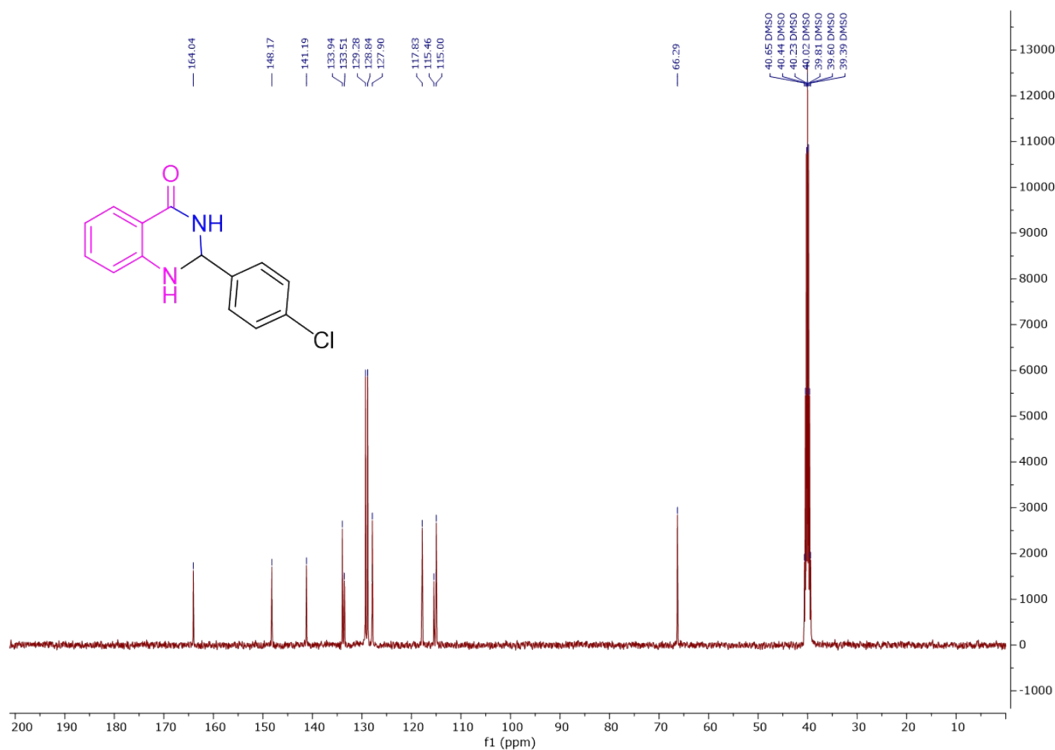

<sup>13</sup>C NMR (100 MHz, DMSO-*d*<sub>6</sub>) δ 164.04, 148.1, 141.1, 133.9, 133.5, 129.2, 128.8, 127.9, 117.8, 115.0, 66.2.

**Figure A2.** <sup>1</sup>H and <sup>13</sup>C NMR of 2-(4-chlorophenyl)-2,3-dihydroquinazolin-4(1*H*)-one.

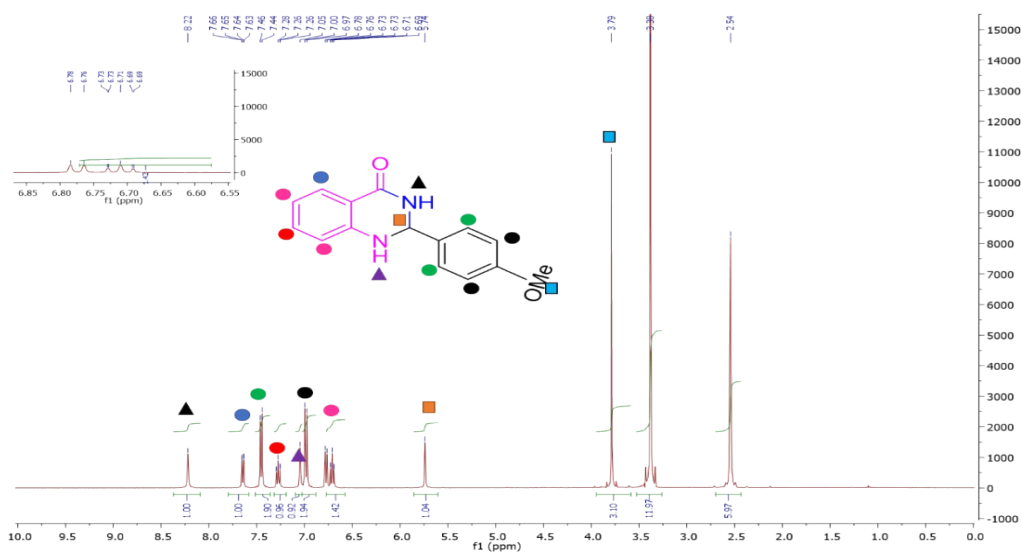

<sup>1</sup>H NMR (400 MHz, DMSO-*d*<sub>6</sub>) δ 8.22 (s, 1H), 7.66–7.63 (d, 1H), 7.46–7.44 (d, 2H), 7.28–7.26 (t, 1H), 7.05 (s, 1H), 7.0–6.97 (dd, *J* = 20.0, 8.7 Hz, 2H), 6.78–6.69 (ddd, *J* = 19.7, 17.2, 9.8 Hz, 1H), 5.74 (s, 3H).

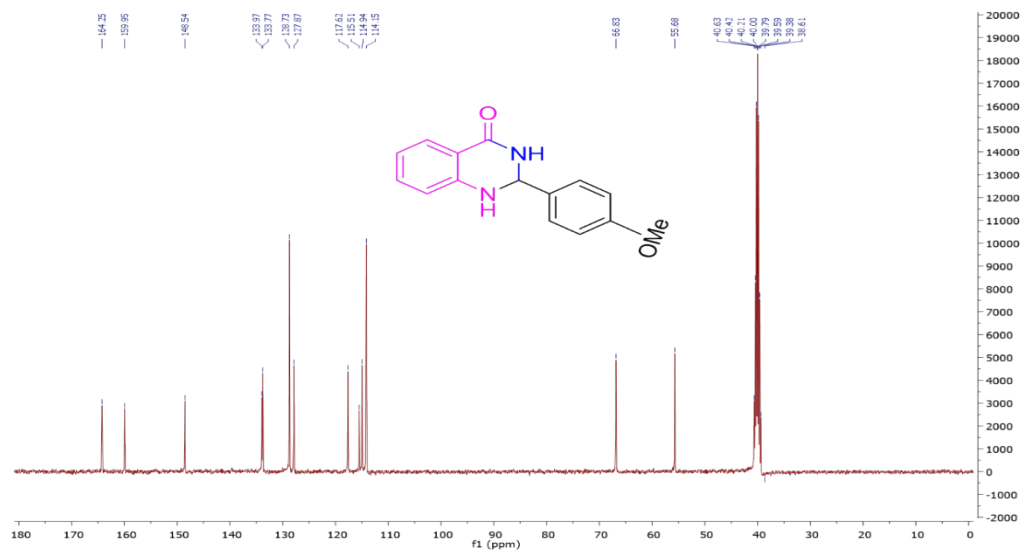

<sup>13</sup>C NMR (100 MHz, DMSO-*d*<sub>6</sub>) δ 164.2, 159.9, 148.5, 133.9, 133.7, 128.7, 127.8, 117.6, 115.5, 114.9, 114.1, 66.8, 55.6.

**Figure A3.** <sup>1</sup>H NMR and <sup>13</sup>C NMR of 2-(4-methoxyphenyl)-2,3-dihydroquinazolin-4(1*H*)-one.

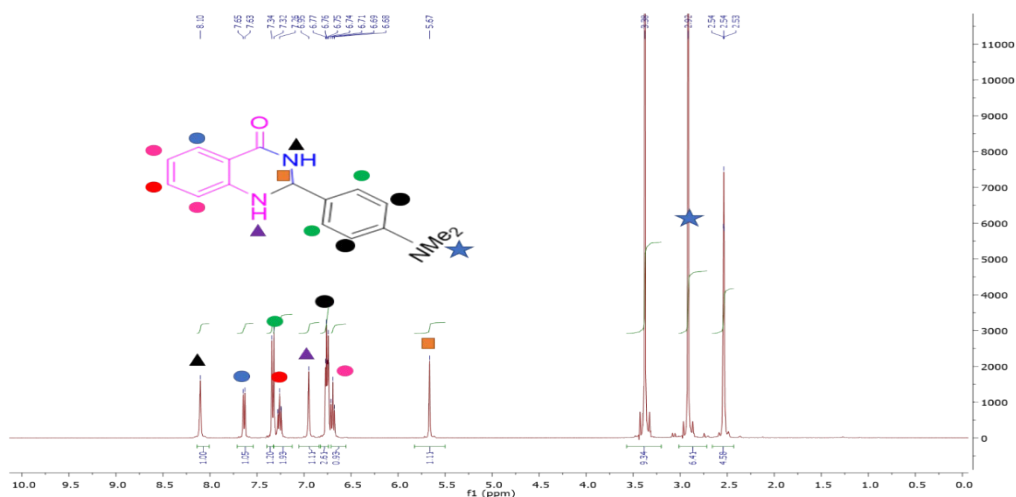

$^1\text{H}$  NMR (400 MHz,  $\text{DMSO}-d_6$ )  $\delta$  8.10 (s, 1H), 7.65–7.63 (d,  $J = 6.9$  Hz, 1H), 7.34–7.32 (d,  $J = 8.7$  Hz, 1H), 7.26–6.95 (m, 2H), 6.95 (s, 1H), 6.77–6.75 (dd,  $J = 8.3, 3.7$  Hz, 3H), 6.74–6.68 (m, 1H), 5.67 (s, 1H), 2.92 (s, 6H).

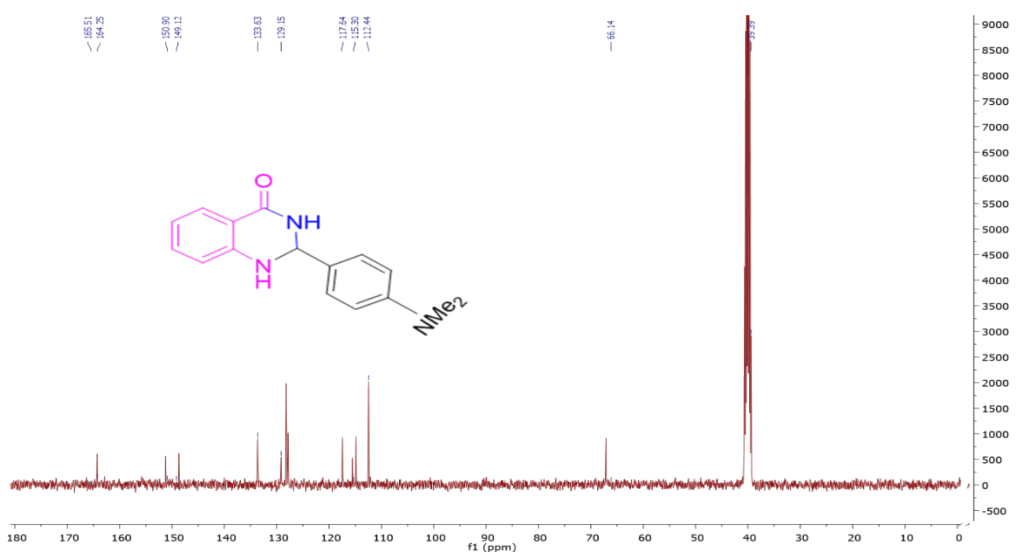

$^{13}\text{C}$  NMR (100 MHz,  $\text{DMSO}-d_6$ )  $\delta$  165.5, 164.2, 150.9, 149.1, 133.6, 129.1, 117.6, 115.3, 112.4, 66.1.

**Figure A4.**  $^1\text{H}$  NMR and  $^{13}\text{C}$  NMR of 2-(4-(dimethylamino)phenyl)-2,3-dihydroquinazolin-4(1H)-one.

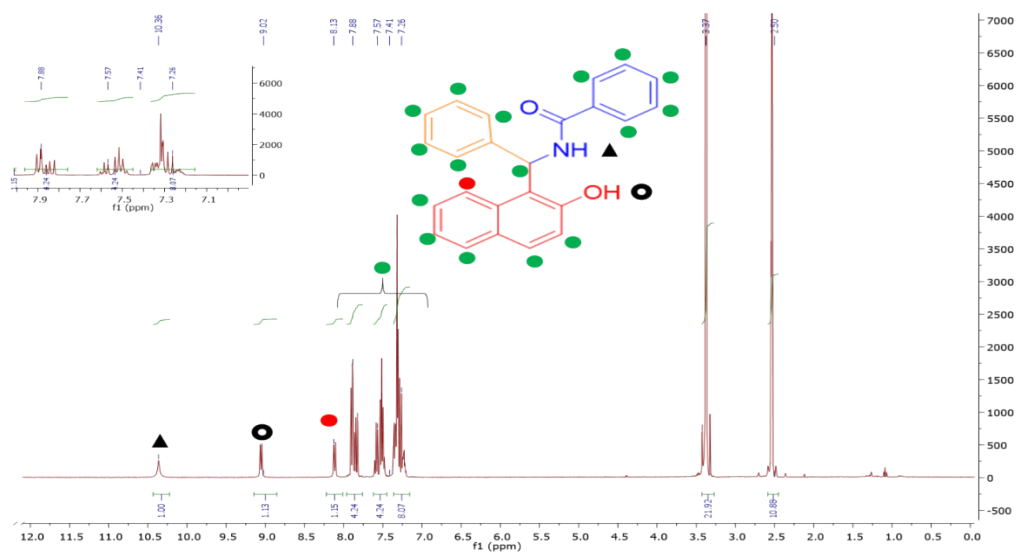

<sup>1</sup>H NMR (400 MHz, DMSO-*d*<sub>6</sub>) δ 10.36 (s, 1H), 9.02 (d, *J* = 8.5 Hz, 1H), 8.13 (d, *J* = 8.6 Hz, 1H), 8.00–7.76 (m, *J* = 24.8, 11.1, 5.0 Hz, 4H), 7.65–7.45 (m, 4H), 7.40–7.06 (m, 8H).

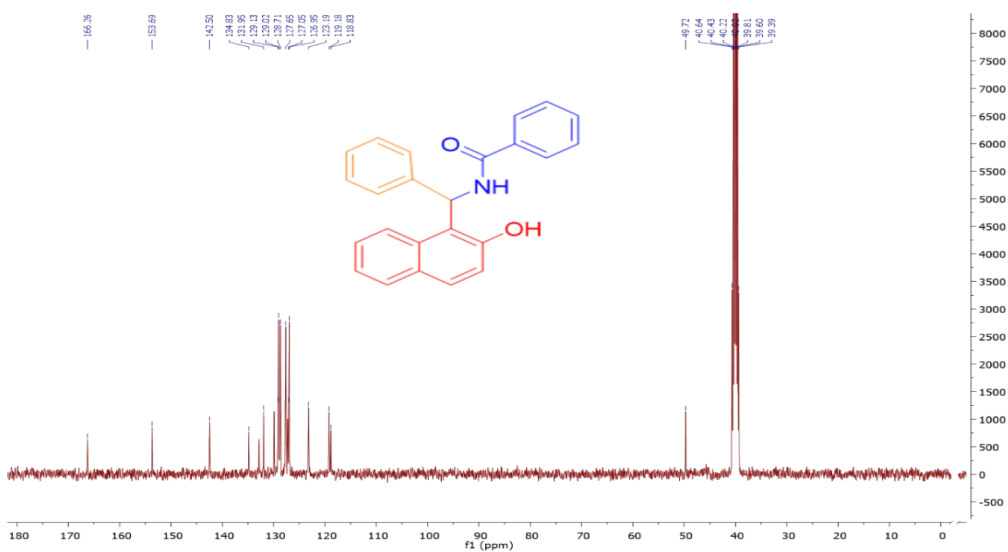

<sup>13</sup>C NMR (100 MHz, DMSO-*d*<sub>6</sub>) δ 166.2, 153.6, 142.5, 134.8, 131.9, 129.1, 129, 128.7, 127.6, 127, 126.9, 123.1, 119.1, 118.8, 49.7.

**Figure A5.** <sup>1</sup>H NMR and <sup>13</sup>C NMR of *N*-((2-hydroxynaphthalen-1-yl)(phenyl)methyl)benzamide.

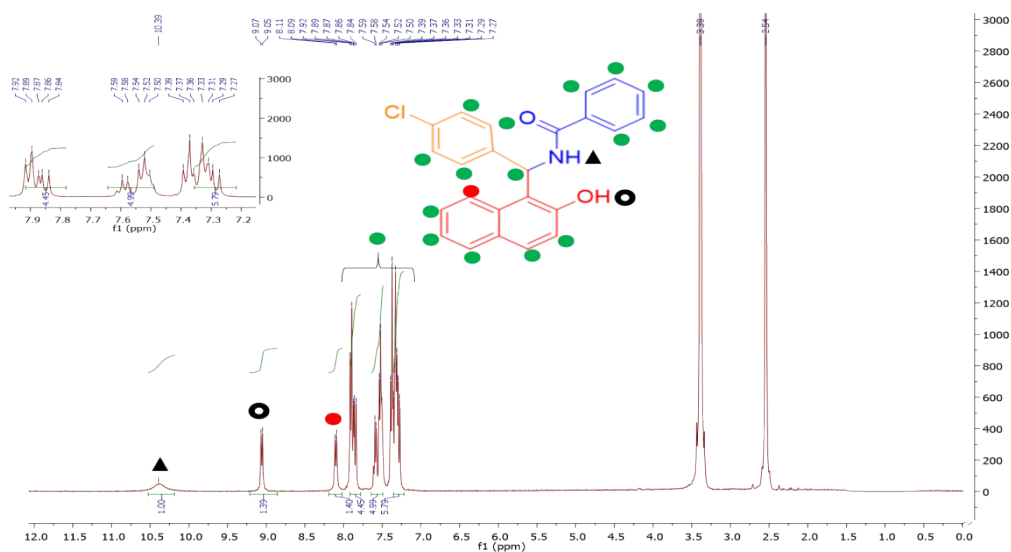

<sup>1</sup>H NMR (400 MHz, DMSO-*d*<sub>6</sub>) δ 10.39 (s, 1H), 9.07–9.05 (d, *J* = 8.3 Hz, 1H), 8.11–8.09 (d, *J* = 8.6 Hz, 1H), 7.92–7.84 (m, 4H), 7.59–7.50 (m, 5H), 7.39–7.27 (ddd, *J* = 22.7, 14.2, 8.7 Hz, 6H), 3.36 (s, 1H), 2.54 (s, 3H).

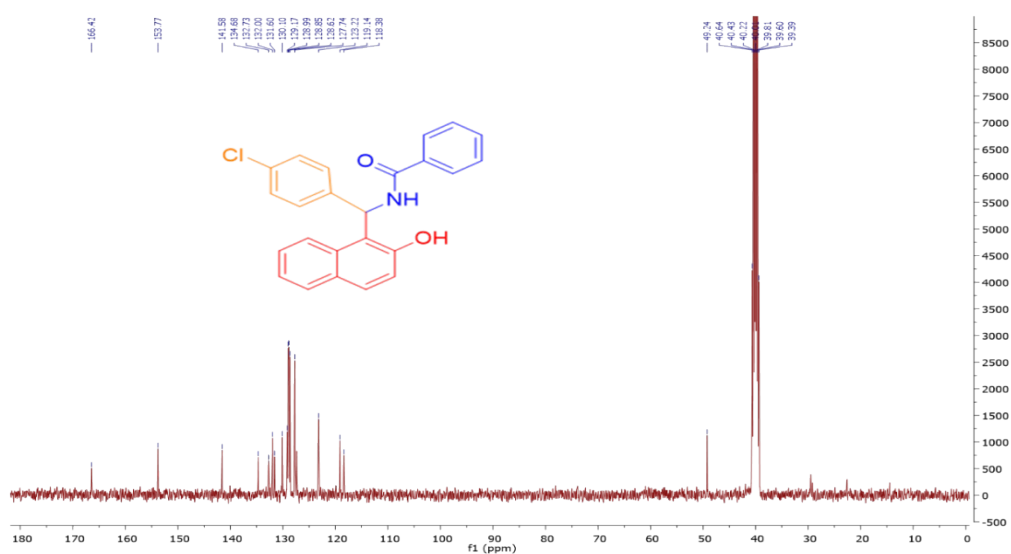

<sup>13</sup>C NMR (100 MHz, DMSO-*d*<sub>6</sub>) δ 166.4, 153.7, 141.5, 134.6, 132.7, 132, 131.6, 130.1, 129.1, 128.9, 128.8, 128.6, 127.7, 123.2, 119.1, 118.3, 49.2.

**Figure A6.** <sup>1</sup>H and <sup>13</sup>C NMR of *N*-((4-chlorophenyl)(2-hydroxynaphthalen-1-yl)methyl)benzamide.

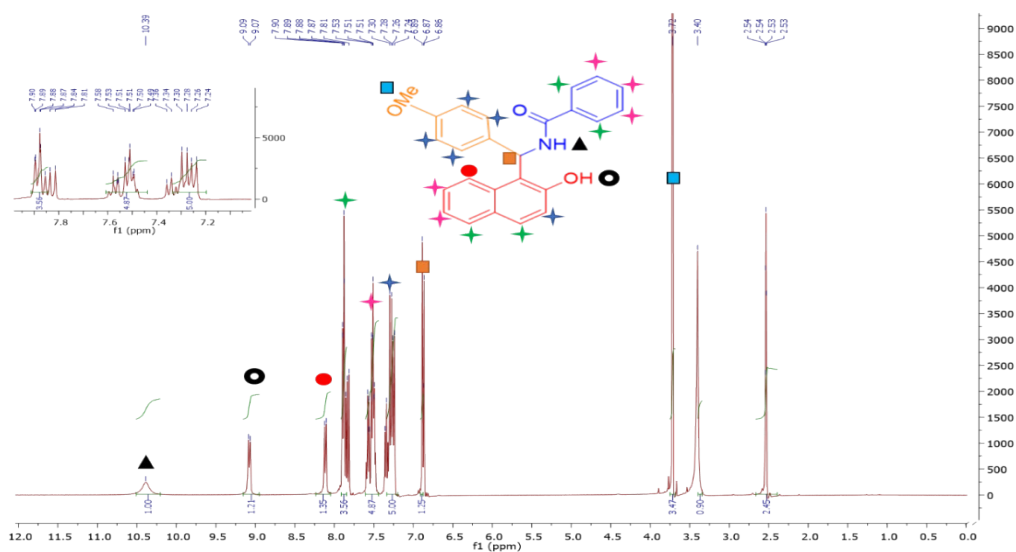

$^1\text{H}$  NMR (400 MHz,  $\text{DMSO-}d_6$ )  $\delta$  10.39 (s, 1H), 9.08–9.07 (d, 1H), 7.90–7.89 (d,  $J = 8.7$  Hz, 1H), 7.88–7.81 (m, 4H), 7.58–7.49 (m, 5H), 7.36–7.24 (m, 5H), 6.87 (s, 1H), 3.72 (s, 3H).

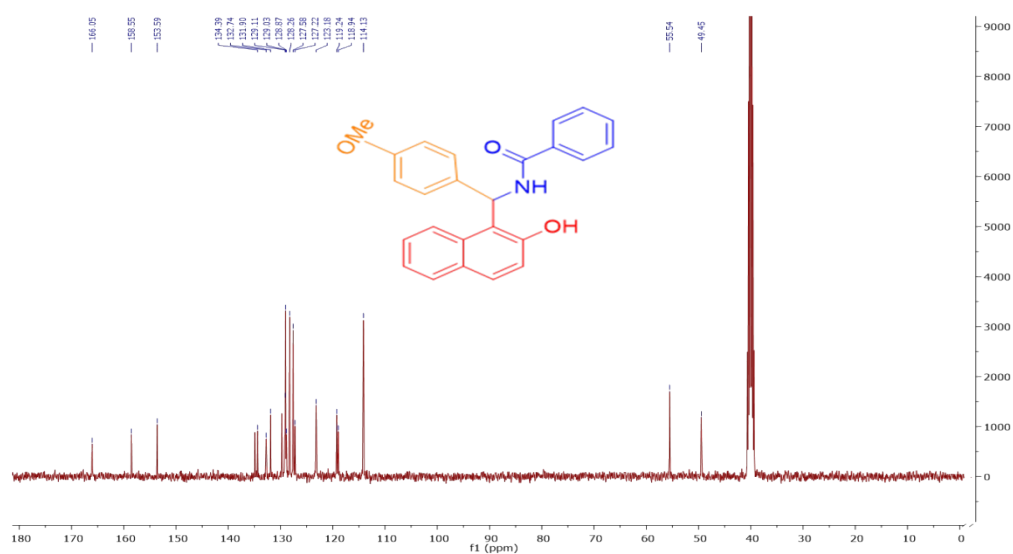

$^{13}\text{C}$  NMR (100 MHz,  $\text{DMSO-}d_6$ )  $\delta$  166, 158.5, 153.5, 134.3, 132.7, 131.9, 129.1, 129, 128.8, 128.2, 127.5, 127.2, 123.1, 119.2, 118.9, 114.1, 55.5, 49.4.

**Figure A7.**  $^1\text{H}$  NMR and  $^{13}\text{C}$  NMR of *N*-((4-methoxy)(2-hydroxynaphthalen-1-yl)methyl)benzamide.

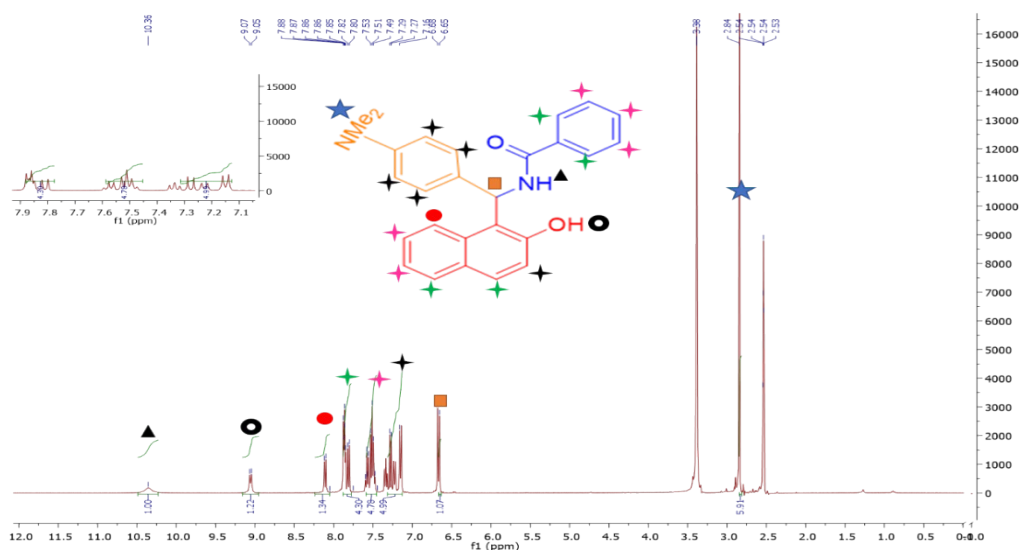

<sup>1</sup>H NMR (400 MHz, DMSO-*d*<sub>6</sub>) δ 10.36 (s, 1H), 9.07 (d, *J* = 8.6 Hz, 1H), 9.05 (d, *J* = 14.2 Hz, 1H), 7.88–7.80 (ddd, *J* = 40.3, 17.9, 12.2 Hz, 4H), 7.53–7.49 (m, 5H), 7.29–7.16 (m, 5H), 6.68–6.65 (d, *J* = 8.9 Hz, 1H), 2.84 (s, 6H).

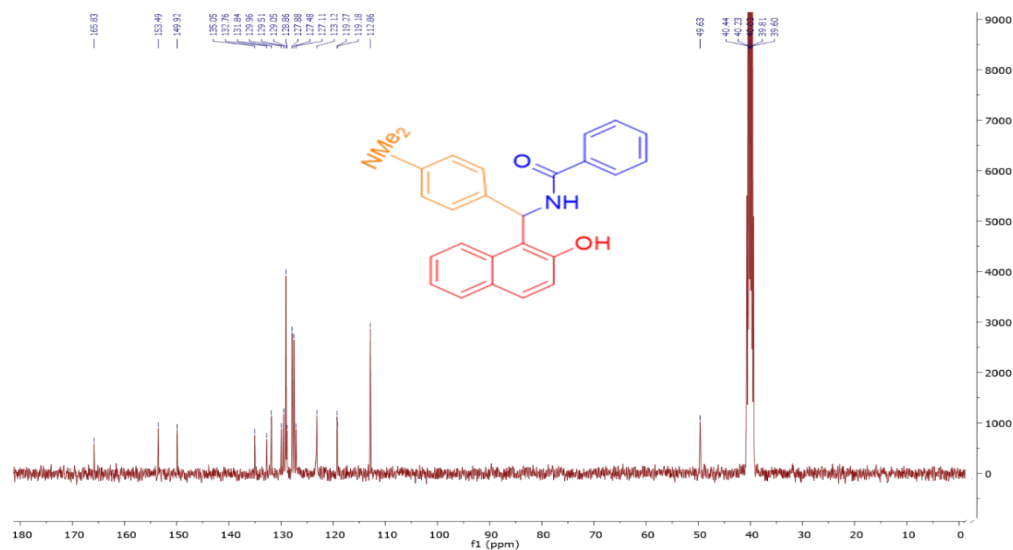

<sup>13</sup>C NMR (100 MHz, DMSO-*d*<sub>6</sub>) δ 165.8, 153.4, 149.9, 135, 132.7, 131.8, 129.9, 129.5, 129, 128.8, 127.8, 127.4, 127.1, 123.1, 119.2, 119.1, 112.8, 49.6.

**Figure A8.** <sup>1</sup>H NMR and <sup>13</sup>C NMR of *N*-((4-(dimethylamino)phenyl)(2-hydroxynaphthalen-1-yl)methyl) benzamide.

## References

1. Zarei, N.; Yarie, M.; Torabi, M.; Zolfigol, M. A. Urea-Rich Porous Organic Polymer as a Hydrogen Bond Catalyst for Knoevenagel Condensation Reaction and Synthesis of 2,3-Dihydroquinazolin-4(1H)-ones. *RSC Adv.* **2024**, *14*, 1094–1105.
2. Razavi, N.; Akhlaghinia, B. Hydroxyapatite Nanoparticles (HAP NPs): A Green and Efficient Heterogeneous Catalyst for Three-Component One-Pot Synthesis of 2,3-Dihydroquinazolin-4(1H)-one Derivatives in Aqueous Media. *New J. Chem.* **2016**, *40*, 447–457.
3. Mitra, B.; Chandra Pariyar, G.; Ghosh, P.  $\beta$ -Cyclodextrin: A Supramolecular Catalyst for Metal-Free Approach Towards the Synthesis of 2-Amino-4,6-diphenylnicotinonitriles and 2,3-Dihydroquinazolin-4(1H)-one. *RSC Adv.* **2021**, *11*, 1271–1281.
4. Kumar, G.; Mogha, N. K.; Masram, D. T. Zr-Based Metal–Organic Framework/Reduced Graphene Oxide Composites for Catalytic Synthesis of 2,3-Dihydroquinazolin-4(1H)-one Derivatives. *ACS Appl. Nano Mater.* **2021**, *4*, 2682–2693.
5. Liu, Y.; Zhao, P.; Duan, C.; He, C. Three-Dimensional Neodymium Metal–Organic Framework for Catalyzing the Cyanosilylation of Aldehyde and the Synthesis of 2,3-Dihydroquinazolin-4(1H)-one Derivatives. *Inorg. Chem.* **2023**, *62*, 10359–10368.
6. Xia, Q.; Zhang, S.; Zhang, Y.; Bai, R.; Li, S.; Zhang, J.; Chen, X. Few-Layered Metal–Organic Framework Nanosheets as Catalysts for the Synthesis of 2,3-Dihydroquinazolinone and Propargylamines. *ACS Appl. Nano Mater.* **2021**, *4*, 12108–12118.
7. Jeevananthan, V.; Senadi, G. C.; Muthu, K.; Arumugam, A.; Shanmugan, S. Construction of Indium(III)–Organic Framework Based on a Flexible Cyclotriphosphazene-Derived Hexacarboxylate as a Reusable Green Catalyst for the Synthesis of Bioactive Aza-Heterocycles. *Inorg. Chem.* **2024**, *63*, 5446–5463.
8. Jin, L.; Le, Z.; Fan, Q.; Yang, J.; Zhang, C.; Li, Q.; Xie, Z. Fast Quinazolinone Synthesis by Combining Enzymatic Catalysis and Photocatalysis. *Photochem. Photobio. Sci.* **2023**, *22*, 525–534.
9. Patil, S. M.; Tandon, R.; Tandon, N.; Singh, I.; Bedre, A.; Gade, V. Magnetite-Supported Montmorillonite (K10) (nanocat-Fe-Si-K10): An Efficient Green Catalyst for Multicomponent Synthesis of Amidoalkyl Naphthol. *RSC Adv.* **2023**, *13*, 17051–17061.

10. Dipake, S. S.; Gadekar, S. P.; Thombre, P. B.; Lande, M. K.; Rajbhoj, A. S.; Gaikwad, S. T. ZS-1 Zeolite as a Highly Efficient and Reusable Catalyst for Facile Synthesis of 1-Amidoalkyl-2-naphthols Under Solvent-Free Conditions. *Catal. Lett.* **2022**, *152*, 755–770.
11. Nasresfahani, Z.; Kassae, M. Z.; Eidi, E. Homopiperazine Sulfamic Acid Functionalized Mesoporous Silica Nanoparticles (MSNs-HPZ-SO<sub>3</sub>H) as an Efficient Catalyst for One-Pot Synthesis of 1-Amidoalkyl-2-naphthols. *New J. Chem.* **2016**, *40*, 4720–4726.
12. Mirjalili, B. F.; Bamoniri, A.; Rahmati, L. One-pot Synthesis of 1-Amidoalkyl-2-naphthols Catalyzed by Nano-BF<sub>3</sub>·SiO<sub>2</sub>. *Arab. J. Chem.* **2019**, *12*, 2216–2223.
13. Mahajan, A.; Mahajan, A.; Kuznetsov, A.; Gupta, M. Cu@Ag-CeO<sub>2</sub>/Chitosan Nanocomposite: Green Catalyst for Synthesis of 4-Arylidene-isoxazolidinones and Amidoalkyl Naphthols with Density Functional Theory and Antimicrobial Studies. *ACS Sust. Chem. Eng.* **2024**, *12*, 3419–3438.
14. Bromberg, L.; Diao, Y.; Wu, H.; Speakman, S. A.; Hatton, T. A. Chromium(III) Terephthalate Metal Organic Framework (MIL-101): HF-Free Synthesis, Structure, Polyoxometalate Composites, and Catalytic Properties. *Chem. Mater.* **2012**, *24*, 1664–1675.
15. El-Yazeed, W. S. A.; Ahmed, A. I. Monometallic and Bimetallic Cu–Ag MOF/MCM-41 Composites: Structural Characterization and Catalytic Activity. *RSC Adv.* **2019**, *9*, 18803–18813.
16. Sun, C.; Mao, S.; Yu, D.; Xue, M.; Sun, X. Synthesis, Characterization, and Photocatalytic Application of Cadmium(II) Sulfide-Magnetite in One-Pot Multi-Component Synthesis of Some 1-Amidoalkyl-2-naphthols. *J. Mol. Struct.* **2024**, *1312*, 138451.
